# Supplementary material
Source: PubMed Central journal article supplement (PMC9104225)
Supplement: NIHMS1800893-supplement-Supplemental_Yoon_et_al_2021_Cat_B_AOMK_inhibitor.pdf [file NIHMS1800893-supplement-Supplemental_Yoon_et_al_2021_Cat_B_AOMK_inhibitor.pdf]

## Supporting Information

### **Selective neutral pH inhibitor of cathepsin B designed based on cleavage preferences at cytosolic and lysosomal pH conditions**

Michael C. Yoon<sup>1,2</sup>, Angelo Solania<sup>3</sup>, Zhenze Jiang<sup>1</sup>, Mitchell P. Christy<sup>4</sup>, Sonia Podvin<sup>1</sup>, Charles Mosier<sup>1</sup>, Christopher B. Lietz<sup>1</sup>, Gen Ito<sup>1</sup>, William H. Gerwick<sup>4</sup>, Dennis W. Wolan<sup>3</sup>, Gregory Hook<sup>5</sup>, Anthony J. O'Donoghue<sup>1\*</sup>, and Vivian Hook<sup>1,6\*</sup>

<sup>1</sup>Skaggs School of Pharmacy and Pharmaceutical Sciences, University of California, San Diego, La Jolla, CA 92037, USA; <sup>2</sup>Biomedical Sciences Graduate Program, University of California, San Diego, La Jolla, CA 92037, USA; <sup>3</sup>Departments of Molecular Medicine and Integrative Structural and Computational Biology, The Scripps Research Institute, La Jolla, CA 92037, USA; <sup>4</sup>Scripps Institution of Oceanography, University of California, San Diego, La Jolla, CA 92037, USA; <sup>5</sup>American Life Sciences Pharmaceuticals, Inc., La Jolla, CA 92037, USA; <sup>6</sup>Department of Neurosciences, School of Medicine, University of California, San Diego, La Jolla, CA 92037, USA

\* Corresponding Authors:

Dr. Vivian Hook, Skaggs School of Pharmacy and Pharmaceutical Sciences, University of California San Diego, 9500 Gilman Dr. MC0657, La Jolla, CA 92093-0657, email [vhook@ucsd.edu](mailto:vhook@ucsd.edu), and

Dr. Anthony J. O'Donoghue, Skaggs School of Pharmacy and Pharmaceutical Sciences, University of California San Diego, 9500 Gilman Dr. MC0655, La Jolla, CA 92093-0655, email [ajodonoghue@ucsd.edu](mailto:ajodonoghue@ucsd.edu)

## Supplemental Information

### Table and Figures

#### Supplemental Table:

**Table S1. Cathepsin B cleavages at positions 1-13 of peptide library substrates at 15 min. and 60 min. in MSP-MS analyses**

#### Supplemental Figures:

**Figure S1. Volcano plot of cathepsin B peptide cleavage products by MSP-MS at pH 7.2 and 4.6.**

Cathepsin B cleavage products generated were quantitated by  $\log_2(\text{Cat.B}/\text{inactivated enzyme})$  as a measure of fold-change of peptide intensities above the quenched inactive enzyme, and assessed for p values ( $p < 0.05$ ).

- (a) MSP-MS peptide products at pH 7.2.
- (b) MSP-MS peptide products at pH 4.6.

**Figure S2. MSP-MS assays: 0% False Positive Rate (FPR) for quenched cathepsin B control.**

**Figure S3. pH curves for the substrates Z-Arg-Lys-AMC, Z-Glu-Lys-AMC, and Z-Phe-Arg-AMC with absolute relative fluorescence (RFU) values for cathepsin B activity.**

**Figure S4. Selectivity of Z-Arg-Lys-AMC and Z-Glu-Lys-AMC substrates for cathepsin B compared to cathepsins L and V, at pH 7.2 and pH 4.6, with comparison to Z-Phe-Arg-AMC.**

- (a) Z-Arg-Lys-AMC substrate for cathepsin B compared to cathepsins L and V.
- (b) Z-Glu-Lys-AMC substrate for cathepsin B compared to cathepsins L and V.
- (c) Z-Phe-Arg-AMC substrate for cathepsin B compared to cathepsins L and V.

**Figure S5. Chemical synthesis of Z-Arg-Lys-AOMK and Z-Glu-Lys-AOMK inhibitors.**

The chemical synthetic steps for Z-Arg-Lys-AOMK and Z-Glu-Lys-AOMK inhibitors are illustrated. The AOMK warhead (blue), with the Lys residue (red), Arg or Glu at the P1 position (black), and the blocking group (purple) are shown. The chemical synthetic steps are described in the methods.

**Figure S6.  $K_i$  determination of the cathepsin B inhibitors Z-Arg-Lys-AOMK and Z-Glu-Lys-AOMK.**

- (a) Z-Arg-Lys-AOMK  $K_i$  determination at pH 7.2 and pH 4.6.
- (b) Z-Glu-Lys-AOMK  $K_i$  determination at pH 7.2 and pH 4.6.

**Figure S7. Irreversible mechanism of Z-Arg-Lys-AOMK and Z-Glu-Lys-AOMK inhibition.**

- (a) Z-Arg-Lys-AOMK inhibition.
- (b) Z-Glu-Lys-AOMK inhibition

Inhibitors were evaluated for irreversible or reversible inhibition of cathepsin B by dilution experiments. Cathepsin B was pre-incubated with inhibitor at 10 times the  $IC_{50}$  concentration, followed by dilution to 1/10 the  $IC_{50}$  concentration, addition of substrate (Z-F-R-AMC), and monitoring activity in time-course assays. Inhibition of cathepsin B following dilution indicates the irreversible inhibitory mechanism of Z-Arg-Lys-AOMK and Z-Glu-Lys-AOMK.

**Figure S8. Model of Z-Arg-Lys-AOMK inhibitor binding interactions to cathepsin B at pH 4.6.**

- (a) Model of the Z-Arg-Lys-AOMK inhibitor docking to cathepsin B at pH 4.6.
- (b) Two-dimensional illustration of Z-Arg-Lys-AOMK and cathepsin B binding interactions at pH 4.6, showing lack of Glu245 interactions with the P2 Arg residue of the Z-Arg-Lys-AOMK inhibitor.

**Figure S9. Model of Z-Glu-Lys-AOMK inhibitor binding interactions to cathepsin B at pH 4.6 and pH 7.2.**

(a) pH 7.2 inhibitor docking. Two-dimensional illustration of Z-Glu-Lys-AMOK interactions with cathepsin B at pH 7.2.

(b) pH 4.6 inhibitor docking. Two-dimensional illustration of Z-Glu-Lys-AMOK interactions with cathepsin B at pH 4.6.

**Figure S10. Z-Arg-Lys-AOMK inhibition of cathepsin B at pH 6.8 and IC<sub>50</sub> value.****Supplemental Methods Information:****Methods S1. LC-MS/MS reports for cathepsin B at pH 7.2 and pH 4.6.**

(a) MSP-MS analyses of Cathepsin B at pH 7.2 and pH 4.6.

(b) MSP-MS analyses of Cathepsin B with Z-Arg-Lys-AOMK and Z-Glu-Lys-AOMK inhibitors at pH 7.2 & pH 4.6.

**Methods S2. PEAKs reports for MS/MS data analyses.**

(a) MSP-MS analyses of Cathepsin B at pH 7.2 and pH 4.6.

(b) MSP-MS analyses of Cathepsin B with Z-Arg-Lys-AOMK and Z-Glu-Lys-AOMK inhibitors at pH 7.2 & pH 4.6.

**Methods S3. Workbook of MSP-MS data**

**Table S1.**

**Cathepsin B cleavages at peptide bonds #1-13 of peptide library substrates at 15 min. and 60 min. in MSP-MS analyses**

| Cleavage at peptide bond number | pH 7.2<br># cleavages |         | pH 4.6<br># cleavages |         |
|---------------------------------|-----------------------|---------|-----------------------|---------|
|                                 | 15 min.               | 60 min. | 15 min.               | 60 min. |
| 1                               | 0                     | 0       | 0                     | 0       |
| 2                               | 0                     | 0       | 0                     | 0       |
| 3                               | 0                     | 0       | 0                     | 0       |
| 4                               | 0                     | 0       | 0                     | 0       |
| 5                               | 0                     | 0       | 0                     | 0       |
| 6                               | 0                     | 0       | 0                     | 0       |
| 7                               | 1                     | 1       | 0                     | 1       |
| 8                               | 0                     | 2       | 1                     | 2       |
| 9                               | 1                     | 2       | 1                     | 2       |
| 10                              | 5                     | 11      | 11                    | 30      |
| 11                              | 1                     | 2       | 3                     | 8       |
| 12                              | 30                    | 44      | 67                    | 95      |
| 13                              | 2                     | 3       | 1                     | 4       |

Cathepsin B was subjected to MSP-MS (multiplex substrate profiling mass spectrometry) analysis at neutral pH 7.2 and acidic pH 4.6. The number of cleavages at each of the peptide bonds at positions 1-13 are illustrated for 15 minutes and 60 incubation of cathepsin B with the 228 14-mer peptide library in MSP-MS analyses. MSP-MS data by nano-LC-MS/MS was analyzed as described in the methods.

**Figure S1. Volcano plot of cathepsin B peptide cleavage products by MSP-MS at pH 7.2 and 4.6.** Cathepsin B cleavage products generated were quantitated by  $\log_2(\text{Cat.B}/\text{inactivated enzyme})$  as a measure of fold-change of peptide intensities above the quenched inactive enzyme, and assessed for p values ( $p < 0.05$ ).  
 (a) MSP-MS peptide products at pH 7.2.  
 (b) MSP-MS peptide products at pH 4.6.

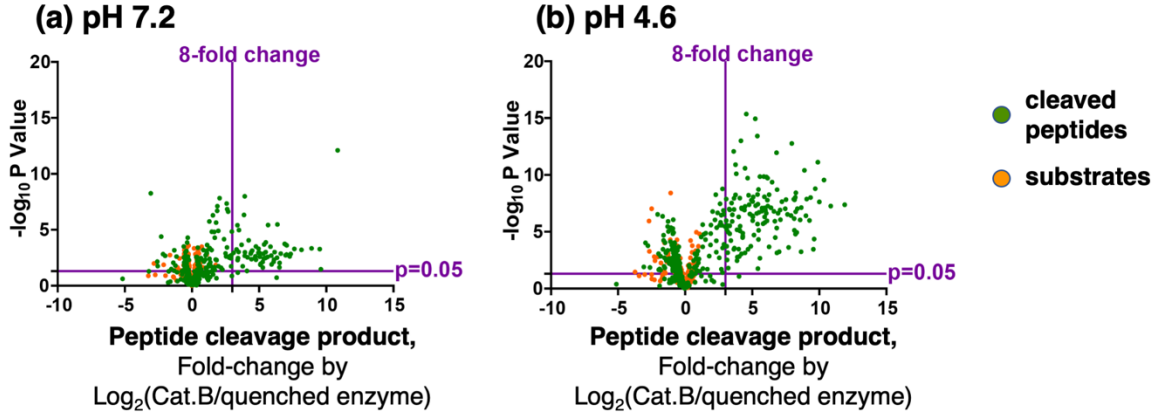

**Figure S2. MSP-MS assays: 0% False Positive Rate (FPR) for quenched cathepsin B control.** Analysis of the threshold for 0% false positive rate (FRP) was conducted by comparing quenched cathepsin B (inactivated by quenching in 8 M urea for 1 hr) incubated with the peptide library (used for MSP-MS) in two groups at pH 7.2 and pH 4.6, each group consisting of 4 replicates and subjected to LC-MS/MS analyses. Intensity values of peptides in these two groups was compared and plotted  $\log_{10}$  of p values vs.  $\log_2$  fold change (comparison of the two groups). The criteria for 0% FPR was met with a threshold of 8-fold ratios of peptides in the two groups. Thus, 8-fold was in MSP-MS activity assays with cathepsin B for 0% FPR.

**MSP-MS Peptide Fold-Change Comparison  
for Quenched Cathepsin B Samples**

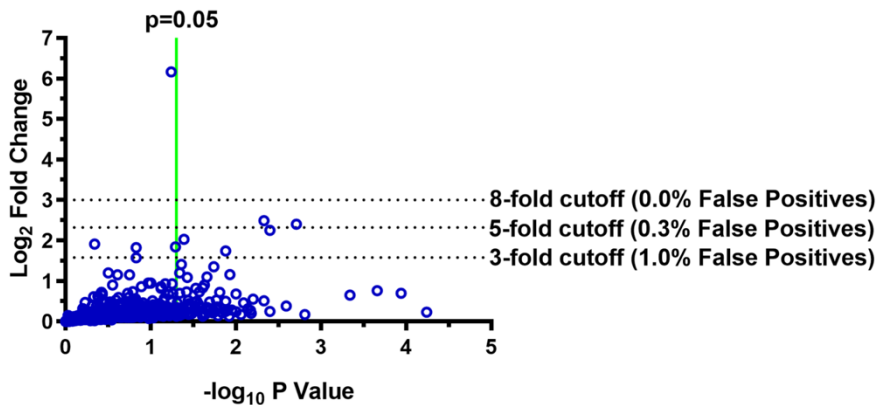

**Figure S3.** pH curves for the substrates Z-Arg-Lys-AMC, Z-Glu-Lys-AMC, and Z-Phe-Arg-AMC with absolute relative fluorescence (RFU) values for cathepsin B activity.

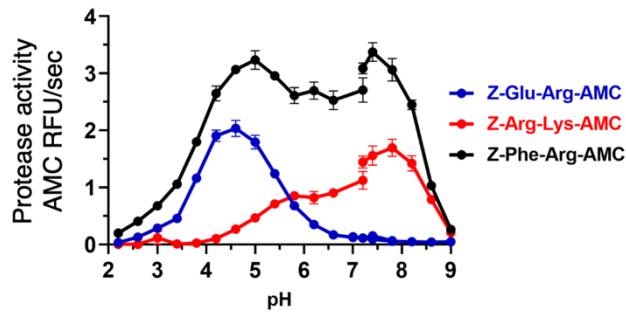

**Figure S4.** Selectivity of Z-Arg-Lys-AMC and Z-Glu-Lys-AMC substrates for cathepsin B compared to cathepsins L and V, at pH 7.2 and pH 4.6, with comparison to Z-Phe-Arg-AMC.

- (a) Z-Arg-Lys-AMC substrate for cathepsin B compared to cathepsins L and V.  
 (b) Z-Glu-Lys-AMC substrate for cathepsin B compared to cathepsins L and V.  
 (c) Z-Phe-Arg-AMC substrate for cathepsin B compared to cathepsins L and V.

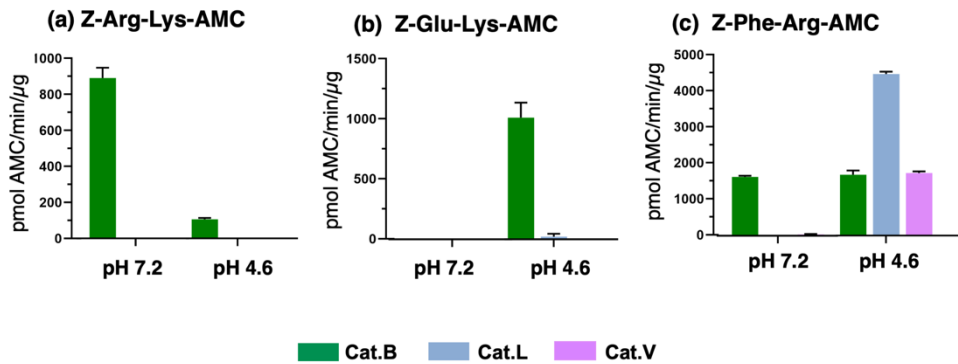

### Figure S5. Chemical synthesis of Z-Arg-Lys-AOMK and Z-Glu-Lys-AOMK inhibitors.

The chemical synthetic steps for Z-Arg-Lys-AOMK and Z-Glu-Lys-AOMK inhibitors are illustrated. The AOMK warhead (blue), with the Lys residue (red), Arg or Glu at the P1 position (black), and the blocking group (purple) are shown. The chemical synthetic steps are described in the methods.

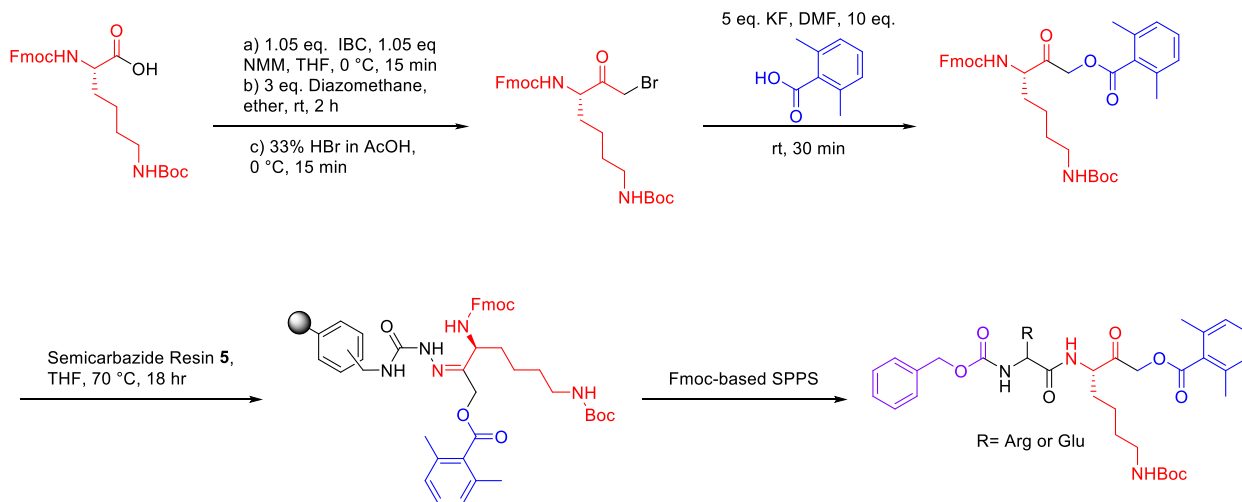

### Figure S6. $K_i$ determination of the cathepsin B inhibitors Z-Arg-Lys-AOMK and Z-Glu-Lys-AOMK.

(a) Z-Arg-Lys-AOMK  $K_i$  determination at pH 7.2 and pH 4.6.

(b) Z-Glu-Lys-AOMK  $K_i$  determination at pH 7.2 and pH 4.6.

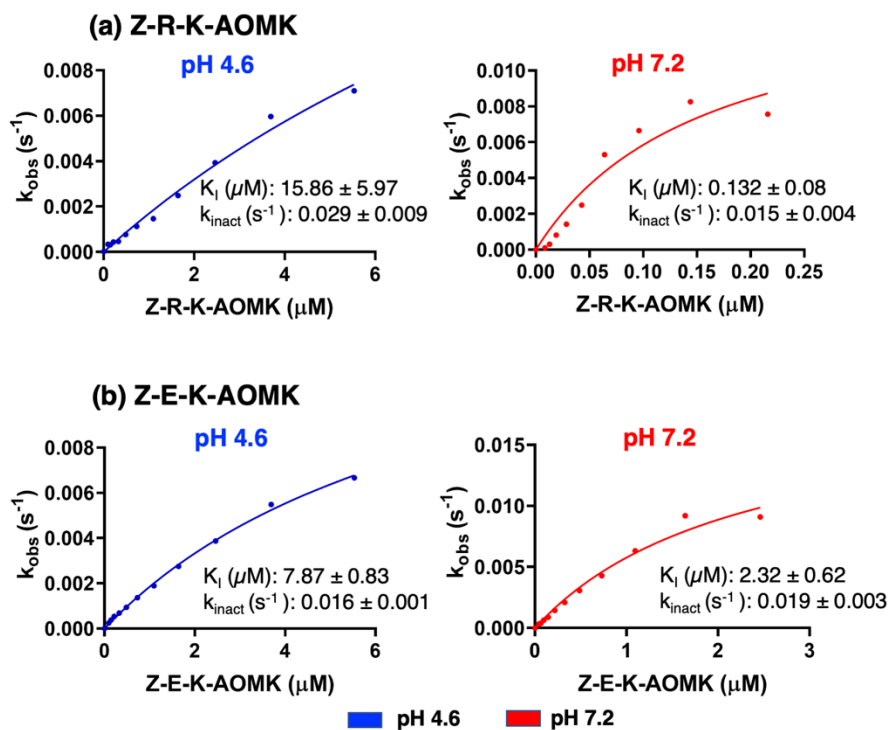

### Figure S7. Irreversible mechanism of Z-Arg-Lys-AOMK and Z-Glu-Lys-AOMK inhibition.

(a) Z-Arg-Lys-AOMK inhibition.

(b) Z-Glu-Lys-AOMK inhibition

Inhibitors were evaluated for irreversible or reversible inhibition of cathepsin B by dilution experiments. Cathepsin B was pre-incubated with inhibitor at 10 times the  $IC_{50}$  concentration, followed by dilution to 1/10 the  $IC_{50}$  concentration, addition of substrate (Z-F-R-AMC), and monitoring activity in time-course assays. Inhibition of cathepsin B following dilution indicates the irreversible inhibitory mechanism of Z-Arg-Lys-AOMK and Z-Glu-Lys-AOMK.

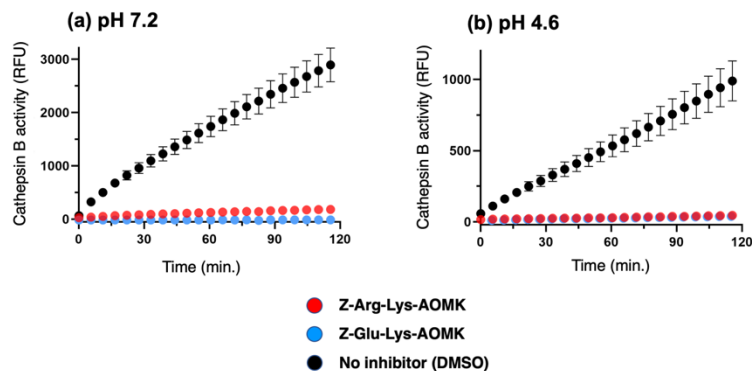

### Figure S8. Model of Z-Arg-Lys-AOMK inhibitor binding interactions to cathepsin B at pH 4.6.

(a) Model of the Z-Arg-Lys-AOMK inhibitor docking to cathepsin B at pH 4.6.

(b) Two-dimensional illustration of Z-Arg-Lys-AOMK and cathepsin B binding interactions at pH 4.6, showing lack of Glu245 interactions with the P2 Arg residue of the Z-Arg-Lys-AOMK inhibitor.

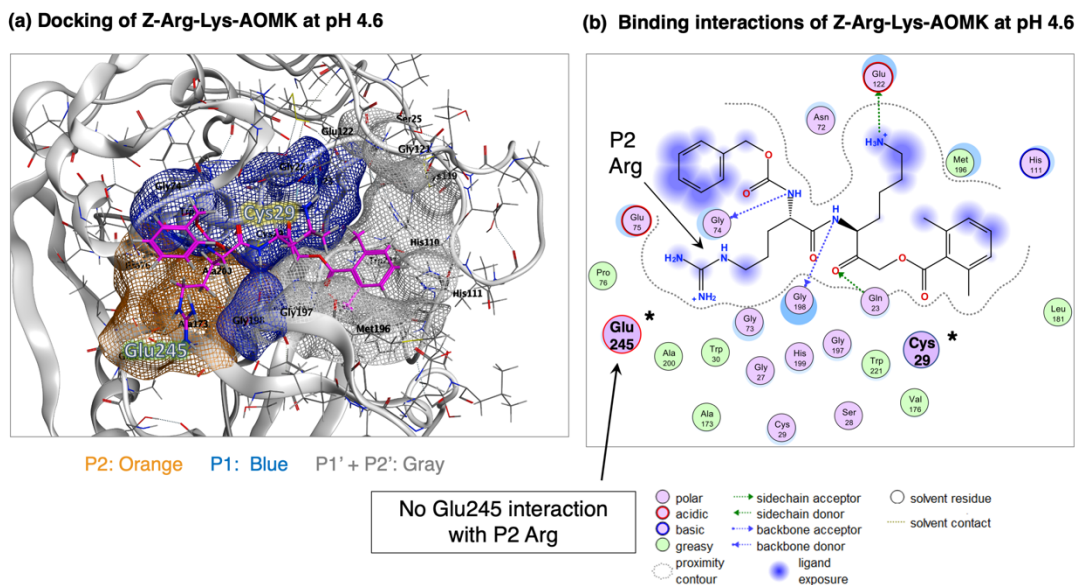



**Figure S9. Model of Z-Glu-Lys-AOMK inhibitor binding interactions to cathepsin B at pH 4.6 and pH 7.2.**

(a) pH 7.2 inhibitor docking. Two-dimensional illustration of Z-Glu-Lys-AMOK interactions with cathepsin B at pH 7.2.

(b) pH 4.6 inhibitor docking. Two-dimensional illustration of Z-Glu-Lys-AMOK interactions with cathepsin B at pH 4.6.

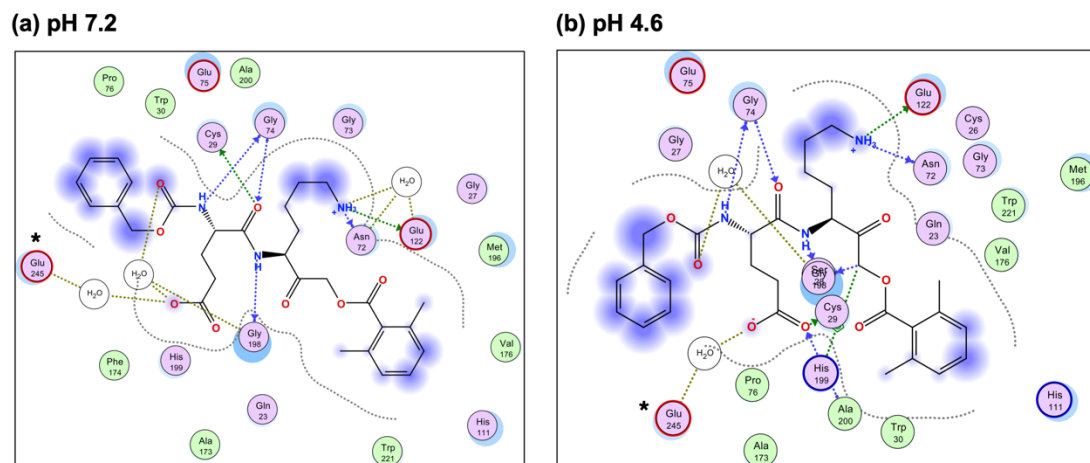

\* No direct interaction of Glu245 with P2 Glu

**Figure S10. Z-Arg-Lys-AOMK inhibition of cathepsin B at pH 6.8 and  $IC_{50}$  value.**

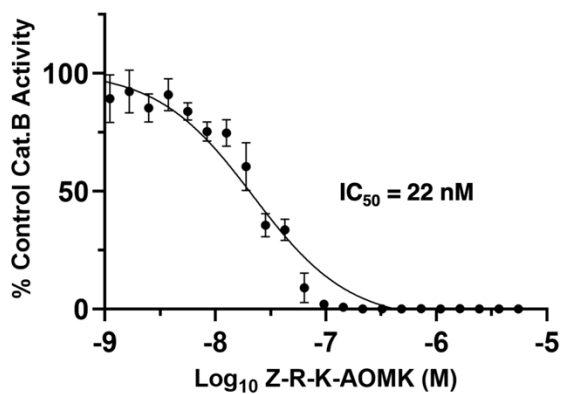

**Supplemental Methods Information:****Methods S1. LC-MS/MS reports for cathepsin B at pH 7.2 and pH 4.6.**

- (a) MSP-MS analyses of Cathepsin B at pH 7.2 and pH 4.6.
- (b) MSP-MS analyses of Cathepsin B with Z-Arg-Lys-AOMK and Z-Glu-Lys-AOMK inhibitors at pH 7.2 & pH 4.6.

**Methods S2. PEAKs reports for MS/MS data analyses.**

- (a) MSP-MS analyses of Cathepsin B at pH 7.2 and pH 4.6.
- (b) MSP-MS analyses of Cathepsin B with Z-Arg-Lys-AOMK and Z-Glu-Lys-AOMK inhibitors at pH 7.2 & pH 4.6.

**Methods S3. Workbook of MSP-MS data**

**Supplemental Information: Methods****Methods S1. LC-MS/MS reports for cathepsin B at pH 7.2 and pH 4.6.**

- (a) MSP-MS analyses of Cathepsin B at pH 7.2 and pH 4.6.
- (b) MSP-MS analyses of Cathepsin B with Z-Arg-Lys-AOMK and Z-Glu-Lys-AOMK inhibitors at pH 7.2 & pH 4.6.

**Methods S2. PEAKs reports for MS/MS data analyses.**

- (a) MSP-MS analyses of Cathepsin B at pH 7.2 and pH 4.6.
- (b) MSP-MS analyses of Cathepsin B with Z-Arg-Lys-AOMK and Z-Glu-Lys-AOMK inhibitors at pH 7.2 & pH 4.6.

**Methods S3. Workbook of MSP-MS data**

**Supplement****Methods S1(a). LC-MS-MS Report, Cathepsin B MSP-MS at pH 4.6 and 7.2.**

Samples were resuspended in 0.1% FA to a total peptide concentration of 114 µM  
 Each sample were injected once, 1 ul total volume per injection

The C18 column consisted of 1.7 µm bead size, 75 µm x 20 cm, heated to 65°C.

Solvent A – water, 0.1% formic acid

Solvent B – acetonitrile, 0.1% formic acid

Nano-LC gradient:

| A          | B             | C           | D           |
|------------|---------------|-------------|-------------|
| Time (min) | Flow (ul/min) | % solvent A | % solvent B |
| 0          | 0.3           | 99          | 1           |
| 5          | 0.3           | 99          | 1           |
| 5.5        | 0.3           | 95          | 5           |
| 55         | 0.3           | 70          | 30          |
| 62         | 0.3           | 25          | 75          |
| 62.5       | 0.3           | 5           | 95          |
| 70         | 0.3           | 5           | 95          |
| 70.5       | 0.3           | 99          | 1           |

## MS Sample List

|                                    |                           |
|------------------------------------|---------------------------|
| MY_20180116_46_0000_1.raw          | MY_20180116_46_0060_1.raw |
| MY_20180116_46_0000_2.raw          | MY_20180116_46_0060_2.raw |
| MY_20180116_46_0000_3.raw          | MY_20180116_46_0060_3.raw |
| MY_20180116_46_0000_4.raw          | MY_20180116_46_0060_4.raw |
| MY_20180116_72_0000_1.raw          | MY_20180116_72_0015_1.raw |
| MY_20180116_72_0000_2.raw          | MY_20180116_72_0015_2.raw |
| MY_20180116_72_0000_3.raw          | MY_20180116_72_0015_3.raw |
| MY_20180116_72_0000_4.raw          | MY_20180116_72_0015_4.raw |
| MY_20180116_46_0015_1_Reinject.raw | MY_20180116_72_0060_1.raw |
| MY_20180116_46_0015_2.raw          | MY_20180116_72_0060_2.raw |
| MY_20180116_46_0015_3.raw          | MY_20180116_72_0060_3.raw |
| MY_20180116_46_0015_4.raw          | MY_20180116_72_0060_4.raw |

Q-Exactive MS Report:

Thermo Scientific SII for Xcalibur Method – Next Pages

## Instrument Method: ZJ\_MSP\_MS\_20180717\_25cm\_5uL

```
Thermo Scientific SII for Xcalibur Method

---- Overview ----
Name: New Instrument Method
Comment:
Run time: 95.000 [min]
Instrument: Hook_nano on 2hyl8d2
Description:
---- Script ----
initial
  Instrument Setup
  PumpModule.LoadingPump.%A.Equate: "%A"
  PumpModule.LoadingPump.%B.Equate: "%B"
  PumpModule.LoadingPump.%C.Equate: "%C"
  PumpModule.LoadingPump.Pressure.LowerLimit: 0 [bar]
  PumpModule.LoadingPump.Pressure.UpperLimit: 600 [bar]
  PumpModule.LoadingPump.MaximumFlowRampUp: 101 [µl/min²]
  PumpModule.LoadingPump.MaximumFlowRampDown: 10 [µl/min²]
  PumpModule.NC_Pump.%A.Equate: "%A"
  PumpModule.NC_Pump.%B.Equate: "%B"
  PumpModule.NC_Pump.Pressure.LowerLimit: 0 [psi]
  PumpModule.NC_Pump.Pressure.UpperLimit: 9800 [psi]
  PumpModule.NC_Pump.MaximumFlowRampUp: 0.300 [µl/min²]
  PumpModule.NC_Pump.MaximumFlowRampDown: 0.300 [µl/min²]
  ColumnOven.TempCtrl: Off
  Sampler.LowDispersionMode: Off
  Sampler.WashSpeed: 4.000 [µl/s]
  Sampler.WashVolume: 50.000 [µl]
  Sampler.PunctureDepth: 7.000 [mm]
  Sampler.SampleHeight: 3.000 [mm]
  Sampler.WasteSpeed: 4.000 [µl/s]
  Sampler.DispenseDelay: 2.000 [s]
  Sampler.DispSpeed: 2.000 [µl/s]
  Sampler.DrawSpeed: 0.500 [µl/s]
  Sampler.DrawDelay: 5.000 [s]
  Sampler.RinseBetweenReinjections: No
  Sampler.InjectMode: UserProg
  Sampler.LoopWashFactor: 2.000
  Sampler.PumpDevice: "NC Pump"
  Sampler.ReagentAVial: R1
  Sampler.ReagentBVial: R2
  Sampler.ReagentCVial: R3
  Sampler.ReagentDVial: R4
  Sampler.ReagentEVial: RA1
  Sampler.ReagentFVial: RA1
  Sampler.ReagentGVial: RA1
  Sampler.ReagentHVial: RA1
  Sampler.TempCtrl: On
  Sampler.Temperature.Nominal: 7.0 [°C]
  Sampler.ReadyTempDelta: None
  Sampler.Temperature.LowerLimit: 4.0 [°C]
```

## Instrument Method: ZJ\_MSP\_MS\_20180717\_25cm\_5uL

```

Thermo Scientific SII for Xcalibur Method

Sampler.Temperature.UpperLimit: 45.0 [°C]
Sampler.UdpSyringeValve Waste
Sampler.UdpMixNeedleWash 100
Sampler.UdpSyringeValve Needle
Sampler.UdpDraw ReagentAVial,
    (2*Sampler.NeedleVolume)+Sampler.LoopVolume,
    GlobalSpeed,
    4 [mm]
Sampler.UdpMixWait 4 [s]
Sampler.UdpInjectValve Load
Sampler.UdpDraw SampleVial,
    Sampler.Volume,
    0.2 [µl/s],
    3.000 [mm]
Sampler.UdpMixWait 4 [s]
Sampler.UdpDraw ReagentAVial,
    (Sampler.LoopVolume-Sampler.Volume)*0.5+Sampler.NeedleVolume,
    GlobalSpeed,
    2 [mm]
Sampler.UdpMixWait 4 [s]
Sampler.UdpInjectValve Inject
Sampler.UdpMixWait Sampler.LoopVolume/PumpModule.NC_Pump.Flow.Nominal*1.1*60
Sampler.UdpInjectValve Load
Sampler.UdpInjectMarker
Sampler.UdpSyringeValve Waste
Sampler.UdpMixNeedleWash 100.000 [µl]
0.000 [min] Inject Preparation
Wait PumpModule.LoadingPump.Ready And PumpModule.NC_Pump.Ready And ColumnOven.Ready
0.000 [min] Inject
Sampler.Inject
0.000 [min] Start Run
PumpModule.NC_Pump.NC_Pump_Pressure.AcqOn
0.000 [min] Run
PumpModule.LoadingPump.Flow.Nominal: 0.000 [µl/min]
PumpModule.LoadingPump.%B.Value: 0.0 [%]
PumpModule.LoadingPump.%C.Value: 0.0 [%]
PumpModule.LoadingPump.Curve: 5
PumpModule.NC_Pump.Flow.Nominal: 0.300 [µl/min]
PumpModule.NC_Pump.%B.Value: 1.0 [%]
PumpModule.NC_Pump.Curve: 5
0.100 [min]
PumpModule.NC_Pump.Flow.Nominal: 0.300 [µl/min]
PumpModule.NC_Pump.%B.Value: 5.0 [%]
PumpModule.NC_Pump.Curve: 5
20.000 [min]
PumpModule.LoadingPump.Flow.Nominal: 0.000 [µl/min]
PumpModule.LoadingPump.%B.Value: 0.0 [%]
PumpModule.LoadingPump.%C.Value: 0.0 [%]

```

## Instrument Method: ZJ\_MSP\_MS\_20180717\_25cm\_5uL

```
Thermo Scientific SII for Xcalibur Method
PumpModule.LoadingPump.Curve: 5
60.000 [min]
PumpModule.NC_Pump.Flow.Nominal: 0.300 [µl/min]
PumpModule.NC_Pump.%B.Value: 30.0 [%]
PumpModule.NC_Pump.Curve: 5
65.000 [min]
PumpModule.NC_Pump.Flow.Nominal: 0.300 [µl/min]
PumpModule.NC_Pump.%B.Value: 85.0 [%]
PumpModule.NC_Pump.Curve: 5
75.000 [min]
PumpModule.NC_Pump.Flow.Nominal: 0.300 [µl/min]
PumpModule.NC_Pump.%B.Value: 85.0 [%]
PumpModule.NC_Pump.Curve: 5
75.100 [min]
PumpModule.NC_Pump.Flow.Nominal: 0.400 [µl/min]
PumpModule.NC_Pump.%B.Value: 90.0 [%]
PumpModule.NC_Pump.Curve: 5
85.000 [min]
PumpModule.NC_Pump.Flow.Nominal: 0.400 [µl/min]
PumpModule.NC_Pump.%B.Value: 90.0 [%]
PumpModule.NC_Pump.Curve: 5
85.100 [min]
PumpModule.NC_Pump.Flow.Nominal: 0.300 [µl/min]
PumpModule.NC_Pump.%B.Value: 1.0 [%]
PumpModule.NC_Pump.Curve: 5
95.000 [min] Stop Run
PumpModule.NC_Pump.NC_Pump_Pressure.AcqOff
```

Instrument Method: ZJ\_MSP\_MS\_20180717\_25cm\_5uL

*Method of Q Exactive*Overall method settings**Global Settings**

|                          |      |
|--------------------------|------|
| Use lock masses          | off  |
| Lock mass injection      | -    |
| Chrom. peak width (FWHM) | 15 s |

**Time**

|                 |           |
|-----------------|-----------|
| Method duration | 95.00 min |
|-----------------|-----------|

**Customized Tolerances (+/-)**

|                   |          |
|-------------------|----------|
| Lock Masses       | -        |
| Inclusion         | -        |
| Exclusion         | -        |
| Neutral Loss      | -        |
| Mass Tags         | -        |
| Dynamic Exclusion | 10.0 ppm |

*Experiment*Full MS / dd-MS<sup>2</sup> (TopN)**General**

|                      |             |
|----------------------|-------------|
| Runtime              | 0 to 95 min |
| Polarity             | Positive    |
| In-source CID        | 0.0 eV      |
| Default charge state | 2           |
| Inclusion            | -           |
| Exclusion            | -           |
| Tags                 | -           |

**Full MS**

|                       |                 |
|-----------------------|-----------------|
| Microscans            | 1               |
| Resolution            | 70,000          |
| AGC target            | 3e6             |
| Maximum IT            | 100 ms          |
| Number of scan ranges | 1               |
| Scan range            | 250 to 1500 m/z |
| Spectrum data type    | Profile         |

**dd-MS<sup>2</sup> / dd-SIM**

|                  |                 |
|------------------|-----------------|
| Microscans       | 1               |
| Resolution       | 17,500          |
| AGC target       | 1e5             |
| Maximum IT       | 50 ms           |
| Loop count       | 12              |
| MSX count        | 1               |
| TopN             | 12              |
| Isolation window | 1.5 m/z         |
| Isolation offset | 0.0 m/z         |
| Scan range       | 200 to 2000 m/z |
| Fixed first mass | 150.0 m/z       |



Instrument Method: ZJ\_MSP\_MS\_20180717\_25cm\_5uL

```

(N)CE / stepped (N)CE                               nce: 28
Spectrum data type                                 Centroid
dd Settings
Minimum AGC target                                 3.00e2
Intensity threshold                                6.0e3
Apex trigger                                       -
Charge exclusion                                   unassigned, 1
Peptide match                                     Preferred
Exclude isotopes                                  on
Dynamic exclusion                                  20.0 s
If idle ..                                         do not pick others

```

**Setup**

**Tunefiles**

**General**

```

Switch Count 0
Base Tunefile C:\Xcalibur\methods\CL_nanoTune_20180409.mstune

```

**Contact Closure**

**General**

```

Used False
Start in Closed True
Switch Count 0

```

**Syringe**

**General**

```

Used False
Start in OFF True
Stop at end of run False
Switch Count 0

```

**Pump setup**

```

Syringe type Hamilton
Flow rate 3.000 µL/min
Inner diameter 2.303 mm
Volume 250 µL

```

**Divert Valve A**

**General**

```

Used False
Start in 1-2 True
Switch Count 0

```

**Divert Valve B**

**General**

```

Used False
Start in 1-2 True
Switch Count 0

```

## Instrument Method: ZJ\_MSP\_MS\_20180717\_25cm\_5uL

```
Thermo Scientific SII for Xcalibur Method

---- Overview ----
Name: New Instrument Method
Comment:
Run time: 95.000 [min]
Instrument: Hook_nano on 2hyl8d2
Description:
---- Script ----
initial
  Instrument Setup
  PumpModule.LoadingPump.%A.Equate: "%A"
  PumpModule.LoadingPump.%B.Equate: "%B"
  PumpModule.LoadingPump.%C.Equate: "%C"
  PumpModule.LoadingPump.Pressure.LowerLimit: 0 [bar]
  PumpModule.LoadingPump.Pressure.UpperLimit: 600 [bar]
  PumpModule.LoadingPump.MaximumFlowRampUp: 101 [µl/min²]
  PumpModule.LoadingPump.MaximumFlowRampDown: 10 [µl/min²]
  PumpModule.NC_Pump.%A.Equate: "%A"
  PumpModule.NC_Pump.%B.Equate: "%B"
  PumpModule.NC_Pump.Pressure.LowerLimit: 0 [psi]
  PumpModule.NC_Pump.Pressure.UpperLimit: 9800 [psi]
  PumpModule.NC_Pump.MaximumFlowRampUp: 0.300 [µl/min²]
  PumpModule.NC_Pump.MaximumFlowRampDown: 0.300 [µl/min²]
  ColumnOven.TempCtrl: Off
  Sampler.LowDispersionMode: Off
  Sampler.WashSpeed: 4.000 [µl/s]
  Sampler.WashVolume: 50.000 [µl]
  Sampler.PunctureDepth: 7.000 [mm]
  Sampler.SampleHeight: 3.000 [mm]
  Sampler.WasteSpeed: 4.000 [µl/s]
  Sampler.DispenseDelay: 2.000 [s]
  Sampler.DispSpeed: 2.000 [µl/s]
  Sampler.DrawSpeed: 0.500 [µl/s]
  Sampler.DrawDelay: 5.000 [s]
  Sampler.RinseBetweenReinjections: No
  Sampler.InjectMode: UserProg
  Sampler.LoopWashFactor: 2.000
  Sampler.PumpDevice: "NC Pump"
  Sampler.ReagentAVial: R1
  Sampler.ReagentBVial: R2
  Sampler.ReagentCVial: R3
  Sampler.ReagentDVial: R4
  Sampler.ReagentEVial: RA1
  Sampler.ReagentFVial: RA1
  Sampler.ReagentGVial: RA1
  Sampler.ReagentHVial: RA1
  Sampler.TempCtrl: On
  Sampler.Temperature.Nominal: 7.0 [°C]
  Sampler.ReadyTempDelta: None
  Sampler.Temperature.LowerLimit: 4.0 [°C]
```

## Instrument Method: ZJ\_MSP\_MS\_20180717\_25cm\_5uL

```

Thermo Scientific SII for Xcalibur Method

Sampler.Temperature.UpperLimit: 45.0 [°C]
Sampler.UdpSyringeValve Waste
Sampler.UdpMixNeedleWash 100
Sampler.UdpSyringeValve Needle
Sampler.UdpDraw ReagentAVial,
    (2*Sampler.NeedleVolume)+Sampler.LoopVolume,
    GlobalSpeed,
    4 [mm]
Sampler.UdpMixWait 4 [s]
Sampler.UdpInjectValve Load
Sampler.UdpDraw SampleVial,
    Sampler.Volume,
    0.2 [µl/s],
    3.000 [mm]
Sampler.UdpMixWait 4 [s]
Sampler.UdpDraw ReagentAVial,
    (Sampler.LoopVolume-Sampler.Volume)*0.5+Sampler.NeedleVolume,
    GlobalSpeed,
    2 [mm]
Sampler.UdpMixWait 4 [s]
Sampler.UdpInjectValve Inject
Sampler.UdpMixWait Sampler.LoopVolume/PumpModule.NC_Pump.Flow.Nominal*1.1*60
Sampler.UdpInjectValve Load
Sampler.UdpInjectMarker
Sampler.UdpSyringeValve Waste
Sampler.UdpMixNeedleWash 100.000 [µl]
0.000 [min] Inject Preparation
Wait PumpModule.LoadingPump.Ready And PumpModule.NC_Pump.Ready And ColumnOven.Ready
0.000 [min] Inject
Sampler.Inject
0.000 [min] Start Run
PumpModule.NC_Pump.NC_Pump_Pressure.AcqOn
0.000 [min] Run
PumpModule.LoadingPump.Flow.Nominal: 0.000 [µl/min]
PumpModule.LoadingPump.%B.Value: 0.0 [%]
PumpModule.LoadingPump.%C.Value: 0.0 [%]
PumpModule.LoadingPump.Curve: 5
PumpModule.NC_Pump.Flow.Nominal: 0.300 [µl/min]
PumpModule.NC_Pump.%B.Value: 1.0 [%]
PumpModule.NC_Pump.Curve: 5
0.100 [min]
PumpModule.NC_Pump.Flow.Nominal: 0.300 [µl/min]
PumpModule.NC_Pump.%B.Value: 5.0 [%]
PumpModule.NC_Pump.Curve: 5
20.000 [min]
PumpModule.LoadingPump.Flow.Nominal: 0.000 [µl/min]
PumpModule.LoadingPump.%B.Value: 0.0 [%]
PumpModule.LoadingPump.%C.Value: 0.0 [%]

```

## Instrument Method: ZJ\_MSP\_MS\_20180717\_25cm\_5uL

```
Thermo Scientific SII for Xcalibur Method
PumpModule.LoadingPump.Curve: 5
60.000 [min]
PumpModule.NC_Pump.Flow.Nominal: 0.300 [µl/min]
PumpModule.NC_Pump.%B.Value: 30.0 [%]
PumpModule.NC_Pump.Curve: 5
65.000 [min]
PumpModule.NC_Pump.Flow.Nominal: 0.300 [µl/min]
PumpModule.NC_Pump.%B.Value: 85.0 [%]
PumpModule.NC_Pump.Curve: 5
75.000 [min]
PumpModule.NC_Pump.Flow.Nominal: 0.300 [µl/min]
PumpModule.NC_Pump.%B.Value: 85.0 [%]
PumpModule.NC_Pump.Curve: 5
75.100 [min]
PumpModule.NC_Pump.Flow.Nominal: 0.400 [µl/min]
PumpModule.NC_Pump.%B.Value: 90.0 [%]
PumpModule.NC_Pump.Curve: 5
85.000 [min]
PumpModule.NC_Pump.Flow.Nominal: 0.400 [µl/min]
PumpModule.NC_Pump.%B.Value: 90.0 [%]
PumpModule.NC_Pump.Curve: 5
85.100 [min]
PumpModule.NC_Pump.Flow.Nominal: 0.300 [µl/min]
PumpModule.NC_Pump.%B.Value: 1.0 [%]
PumpModule.NC_Pump.Curve: 5
95.000 [min] Stop Run
PumpModule.NC_Pump.NC_Pump_Pressure.AcqOff
```

Instrument Method: ZJ\_MSP\_MS\_20180717\_25cm\_5uL

*Method of Q Exactive*Overall method settings**Global Settings**

|                          |      |
|--------------------------|------|
| Use lock masses          | off  |
| Lock mass injection      | -    |
| Chrom. peak width (FWHM) | 15 s |

**Time**

|                 |           |
|-----------------|-----------|
| Method duration | 95.00 min |
|-----------------|-----------|

**Customized Tolerances (+/-)**

|                   |          |
|-------------------|----------|
| Lock Masses       | -        |
| Inclusion         | -        |
| Exclusion         | -        |
| Neutral Loss      | -        |
| Mass Tags         | -        |
| Dynamic Exclusion | 10.0 ppm |

*Experiment*Full MS / dd-MS<sup>2</sup> (TopN)**General**

|                      |             |
|----------------------|-------------|
| Runtime              | 0 to 95 min |
| Polarity             | Positive    |
| In-source CID        | 0.0 eV      |
| Default charge state | 2           |
| Inclusion            | -           |
| Exclusion            | -           |
| Tags                 | -           |

**Full MS**

|                       |                 |
|-----------------------|-----------------|
| Microscans            | 1               |
| Resolution            | 70,000          |
| AGC target            | 3e6             |
| Maximum IT            | 100 ms          |
| Number of scan ranges | 1               |
| Scan range            | 250 to 1500 m/z |
| Spectrum data type    | Profile         |

**dd-MS<sup>2</sup> / dd-SIM**

|                  |                 |
|------------------|-----------------|
| Microscans       | 1               |
| Resolution       | 17,500          |
| AGC target       | 1e5             |
| Maximum IT       | 50 ms           |
| Loop count       | 12              |
| MSX count        | 1               |
| TopN             | 12              |
| Isolation window | 1.5 m/z         |
| Isolation offset | 0.0 m/z         |
| Scan range       | 200 to 2000 m/z |
| Fixed first mass | 150.0 m/z       |

Instrument Method: ZJ\_MSP\_MS\_20180717\_25cm\_5uL

```
(N)CE / stepped (N)CE                               nce: 28
Spectrum data type                                   Centroid
dd Settings
Minimum AGC target                                   3.00e2
Intensity threshold                                  6.0e3
Apex trigger                                          -
Charge exclusion                                     unassigned, 1
Peptide match                                        Preferred
Exclude isotopes                                     on
Dynamic exclusion                                    20.0 s
If idle ..                                           do not pick others
```

**Setup****Tunefiles****General**

```
Switch Count 0
Base Tunefile C:\Xcalibur\methods\CL_nanoTune_20180409.mstune
```

**Contact Closure****General**

```
Used False
Start in Closed True
Switch Count 0
```

**Syringe****General**

```
Used False
Start in OFF True
Stop at end of run False
Switch Count 0
```

**Pump setup**

```
Syringe type Hamilton
Flow rate 3.000 µL/min
Inner diameter 2.303 mm
Volume 250 µL
```

**Divert Valve A****General**

```
Used False
Start in 1-2 True
Switch Count 0
```

**Divert Valve B****General**

```
Used False
Start in 1-2 True
Switch Count 0
```

**Supplement****Methods S1(b). LC-MS-MS Report, Cathepsin B MSP-MS with Peptidic AOMK Inhibitors, pH 4.6 and 7.2.**

Samples were resuspended in 0.1% TFA to a total peptide concentration of 28.5  $\mu$ M  
 Each sample were injected once, 4 ul total volume per injection

The C18 column consisted of 1.7  $\mu$ m bead size, 75  $\mu$ m x 20 cm, heated to 65°C.

Solvent A – water, 0.1% formic acid

Solvent B – acetonitrile, 0.1% formic acid

**Nano-LC gradient:**

| A          | B             | C           | D           |
|------------|---------------|-------------|-------------|
| Time (min) | Flow (ul/min) | % solvent A | % solvent B |
| 0          | 0.3           | 99          | 1           |
| 0.1        | 0.3           | 95          | 5           |
| 60         | 0.3           | 70          | 30          |
| 65         | 0.3           | 15          | 85          |
| 75         | 0.3           | 15          | 85          |
| 75.1       | 0.4           | 10          | 90          |
| 85         | 0.4           | 10          | 90          |
| 85.1       | 0.3           | 99          | 1           |

**MS Sample List**

|                         |                                |
|-------------------------|--------------------------------|
| 7 RK_d_MY_pH72_60.raw   | 4 RK_d_MY_pH46_60.raw          |
| 7 RK_c_MY_pH72_60.raw   | 4 RK_c_MY_pH46_60.raw          |
| 7 RK_b_MY_pH72_60.raw   | 4 RK_b_MY_pH46_60_Reinject.raw |
| 7 RK_a_MY_pH72_60.raw   | 4 RK_a_MY_pH46_60.raw          |
| 7 Q_d_MY_pH72_60.raw    | 4 Q_d_MY_pH46_60.raw           |
| 7 Q_c_MY_pH72_60.raw    | 4 Q_c_MY_pH46_60.raw           |
| 7 Q_b_MY_pH72_60.raw    | 4 Q_b_MY_pH46_60.raw           |
| 7 Q_a_MY_pH72_60.raw    | 4 Q_a_MY_pH46_60.raw           |
| 7 EK_d_MY_pH72_60.raw   | 4 EK_d_MY_pH46_60.raw          |
| 7 EK_c_MY_pH72_60.raw   | 4 EK_c_MY_pH46_60.raw          |
| 7 EK_b_MY_pH72_60.raw   | 4 EK_b_MY_pH46_60.raw          |
| 7 EK_a_MY_pH72_60.raw   | 4 EK_a_MY_pH46_60.raw          |
| 7 DMSO_d_MY_pH72_60.raw | 4 DMSO_d_MY_pH46_60.raw        |
| 7 DMSO_c_MY_pH72_60.raw | 4 DMSO_c_MY_pH46_60.raw        |
| 7 DMSO_b_MY_pH72_60.raw | 4 DMSO_b_MY_pH46_60.raw        |
| 7 DMSO_a_MY_pH72_60.raw | 4 DMSO_a_MY_pH46_60.raw        |

Q-Exactive MS Report:

Thermo Scientific SII for Xcalibur Method – Next Pages

## Instrument Method: ZJ\_MSP\_MS\_20200323\_25cm\_5uL

```
Thermo Scientific SII for Xcalibur Method

---- Overview ----
Name: New Instrument Method
Comment:
Run time: 100.000 [min]
Instrument: Hook_nano on 2hyl8d2
Description:
---- Script ----
initial
  Instrument Setup
  PumpModule.LoadingPump.%A.Equate: "%A"
  PumpModule.LoadingPump.%B.Equate: "%B"
  PumpModule.LoadingPump.%C.Equate: "%C"
  PumpModule.LoadingPump.Pressure.LowerLimit: 0 [bar]
  PumpModule.LoadingPump.Pressure.UpperLimit: 600 [bar]
  PumpModule.LoadingPump.MaximumFlowRampUp: 101 [µl/min²]
  PumpModule.LoadingPump.MaximumFlowRampDown: 10 [µl/min²]
  PumpModule.NC_Pump.%A.Equate: "%A"
  PumpModule.NC_Pump.%B.Equate: "%B"
  PumpModule.NC_Pump.Pressure.LowerLimit: 0 [psi]
  PumpModule.NC_Pump.Pressure.UpperLimit: 9800 [psi]
  PumpModule.NC_Pump.MaximumFlowRampUp: 0.300 [µl/min²]
  PumpModule.NC_Pump.MaximumFlowRampDown: 0.300 [µl/min²]
  ColumnOven.TempCtrl: Off
  Sampler.LowDispersionMode: Off
  Sampler.WashSpeed: 4.000 [µl/s]
  Sampler.WashVolume: 50.000 [µl]
  Sampler.PunctureDepth: 7.000 [mm]
  Sampler.SampleHeight: 3.000 [mm]
  Sampler.WasteSpeed: 4.000 [µl/s]
  Sampler.DispenseDelay: 2.000 [s]
  Sampler.DispSpeed: 2.000 [µl/s]
  Sampler.DrawSpeed: 0.500 [µl/s]
  Sampler.DrawDelay: 5.000 [s]
  Sampler.RinseBetweenReinjections: No
  Sampler.InjectMode: UserProg
  Sampler.LoopWashFactor: 2.000
  Sampler.PumpDevice: "NC Pump"
  Sampler.ReagentAVial: R1
  Sampler.ReagentBVial: R2
  Sampler.ReagentCVial: R3
  Sampler.ReagentDVial: R4
  Sampler.ReagentEVial: RA1
  Sampler.ReagentFVial: RA1
  Sampler.ReagentGVial: RA1
  Sampler.ReagentHVial: RA1
  Sampler.TempCtrl: On
  Sampler.Temperature.Nominal: 7.0 [°C]
  Sampler.ReadyTempDelta: None
  Sampler.Temperature.LowerLimit: 4.0 [°C]
```



## Instrument Method: ZJ\_MSP\_MS\_20200323\_25cm\_5uL

```

Thermo Scientific SII for Xcalibur Method

Sampler.Temperature.UpperLimit: 45.0 [°C]
Sampler.UdpSyringeValve Waste
Sampler.UdpMixNeedleWash 100
Sampler.UdpSyringeValve Needle
Sampler.UdpDraw ReagentAVial,
    (2*Sampler.NeedleVolume)+Sampler.LoopVolume,
    GlobalSpeed,
    4 [mm]
Sampler.UdpMixWait 4 [s]
Sampler.UdpInjectValve Load
Sampler.UdpDraw SampleVial,
    Sampler.Volume,
    0.2 [µl/s],
    3.000 [mm]
Sampler.UdpMixWait 4 [s]
Sampler.UdpDraw ReagentAVial,
    (Sampler.LoopVolume-Sampler.Volume)*0.5+Sampler.NeedleVolume,
    GlobalSpeed,
    2 [mm]
Sampler.UdpMixWait 4 [s]
Sampler.UdpInjectValve Inject
Sampler.UdpMixWait Sampler.LoopVolume/PumpModule.NC_Pump.Flow.Nominal*1.1*60
Sampler.UdpInjectValve Load
Sampler.UdpInjectMarker
Sampler.UdpSyringeValve Waste
Sampler.UdpMixNeedleWash 100.000 [µl]
0.000 [min] Inject Preparation
Wait PumpModule.LoadingPump.Ready And PumpModule.NC_Pump.Ready And ColumnOven.Ready
0.000 [min] Inject
Sampler.Inject
0.000 [min] Start Run
PumpModule.NC_Pump.NC_Pump_Pressure.AcqOn
0.000 [min] Run
PumpModule.LoadingPump.Flow.Nominal: 0.000 [µl/min]
PumpModule.LoadingPump.%B.Value: 0.0 [%]
PumpModule.LoadingPump.%C.Value: 0.0 [%]
PumpModule.LoadingPump.Curve: 5
PumpModule.NC_Pump.Flow.Nominal: 0.300 [µl/min]
PumpModule.NC_Pump.%B.Value: 1.0 [%]
PumpModule.NC_Pump.Curve: 5
0.100 [min]
PumpModule.NC_Pump.Flow.Nominal: 0.300 [µl/min]
PumpModule.NC_Pump.%B.Value: 5.0 [%]
PumpModule.NC_Pump.Curve: 5
20.000 [min]
PumpModule.LoadingPump.Flow.Nominal: 0.000 [µl/min]
PumpModule.LoadingPump.%B.Value: 0.0 [%]
PumpModule.LoadingPump.%C.Value: 0.0 [%]

```

## Instrument Method: ZJ\_MSP\_MS\_20200323\_25cm\_5uL

```
Thermo Scientific SII for Xcalibur Method
      PumpModule.LoadingPump.Curve: 5
65.000 [min]
      PumpModule.NC_Pump.Flow.Nominal: 0.300 [µl/min]
      PumpModule.NC_Pump.%B.Value: 40.0 [%]
      PumpModule.NC_Pump.Curve: 5
70.000 [min]
      PumpModule.NC_Pump.Flow.Nominal: 0.300 [µl/min]
      PumpModule.NC_Pump.%B.Value: 85.0 [%]
      PumpModule.NC_Pump.Curve: 5
80.000 [min]
      PumpModule.NC_Pump.Flow.Nominal: 0.300 [µl/min]
      PumpModule.NC_Pump.%B.Value: 85.0 [%]
      PumpModule.NC_Pump.Curve: 5
80.100 [min]
      PumpModule.NC_Pump.Flow.Nominal: 0.400 [µl/min]
      PumpModule.NC_Pump.%B.Value: 90.0 [%]
      PumpModule.NC_Pump.Curve: 5
90.000 [min]
      PumpModule.NC_Pump.Flow.Nominal: 0.400 [µl/min]
      PumpModule.NC_Pump.%B.Value: 90.0 [%]
      PumpModule.NC_Pump.Curve: 5
90.100 [min]
      PumpModule.NC_Pump.Flow.Nominal: 0.300 [µl/min]
      PumpModule.NC_Pump.%B.Value: 1.0 [%]
      PumpModule.NC_Pump.Curve: 5
100.000 [min] Stop Run
      PumpModule.NC_Pump.NC_Pump_Pressure.AcqOff
```

Instrument Method: ZJ\_MSP\_MS\_20200323\_25cm\_5uL

*Method of Q Exactive***Overall method settings****Global Settings**

|                          |      |
|--------------------------|------|
| Use lock masses          | off  |
| Lock mass injection      | -    |
| Chrom. peak width (FWHM) | 15 s |

**Time**

|                 |           |
|-----------------|-----------|
| Method duration | 95.00 min |
|-----------------|-----------|

**Customized Tolerances (+/-)**

|                   |          |
|-------------------|----------|
| Lock Masses       | -        |
| Inclusion         | -        |
| Exclusion         | -        |
| Neutral Loss      | -        |
| Mass Tags         | -        |
| Dynamic Exclusion | 10.0 ppm |

***Experiment*****Full MS / dd-MS<sup>2</sup> (TopN)****General**

|                      |             |
|----------------------|-------------|
| Runtime              | 0 to 95 min |
| Polarity             | Positive    |
| In-source CID        | 0.0 eV      |
| Default charge state | 2           |
| Inclusion            | -           |
| Exclusion            | -           |
| Tags                 | -           |

**Full MS**

|                       |                 |
|-----------------------|-----------------|
| Microscans            | 1               |
| Resolution            | 70,000          |
| AGC target            | 3e6             |
| Maximum IT            | 100 ms          |
| Number of scan ranges | 1               |
| Scan range            | 250 to 1500 m/z |
| Spectrum data type    | Profile         |

**dd-MS<sup>2</sup> / dd-SIM**

|                  |                 |
|------------------|-----------------|
| Microscans       | 1               |
| Resolution       | 17,500          |
| AGC target       | 1e5             |
| Maximum IT       | 50 ms           |
| Loop count       | 15              |
| MSX count        | 1               |
| TopN             | 15              |
| Isolation window | 1.5 m/z         |
| Isolation offset | 0.0 m/z         |
| Scan range       | 200 to 2000 m/z |
| Fixed first mass | 150.0 m/z       |

Instrument Method: ZJ\_MSP\_MS\_20200323\_25cm\_5uL

```

(N)CE / stepped (N)CE                               nce: 28
Spectrum data type                               Centroid
dd Settings
Minimum AGC target                               3.00e2
Intensity threshold                               6.0e3
Apex trigger                                     -
Charge exclusion                                 unassigned, 1
Peptide match                                    Preferred
Exclude isotopes                                 on
Dynamic exclusion                                20.0 s
If idle ..                                       do not pick others

```

**Setup****Tunefiles****General**

```

Switch Count 0
Base Tunefile C:\Xcalibur\methods\ZJ_nanoTune_20200115.mstune

```

**Contact Closure****General**

```

Used False
Start in Closed True
Switch Count 0

```

**Syringe****General**

```

Used False
Start in OFF True
Stop at end of run False
Switch Count 0

```

**Pump setup**

```

Syringe type Hamilton
Flow rate 3.000 µL/min
Inner diameter 2.303 mm
Volume 250 µL

```

**Divert Valve A****General**

```

Used False
Start in 1-2 True
Switch Count 0

```

**Divert Valve B****General**

```

Used False
Start in 1-2 True
Switch Count 0

```

## Summary

## 1. Notes

## 2. Result Statistics

**Figure 1.** False discovery rate (FDR) curve. X axis is the number of peptide-spectrum matches (PSM) being kept. Y axis is the corresponding FDR.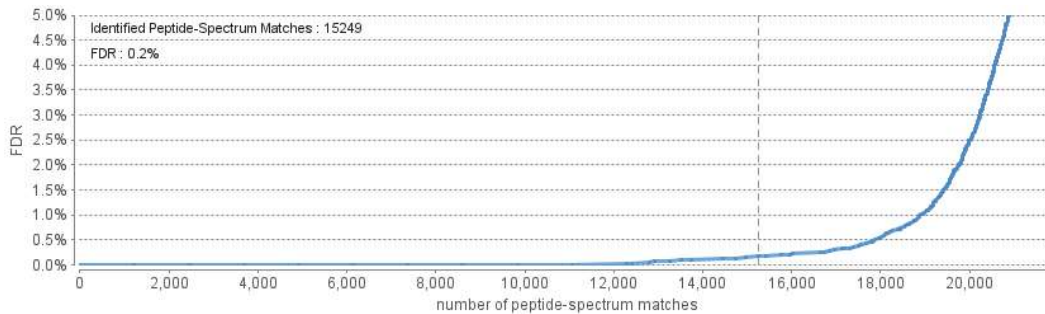**Figure 2.** PSM score distribution. (a) Distribution of PEAKS peptide score; (b) Scatterplot of PEAKS peptide score versus precursor mass error.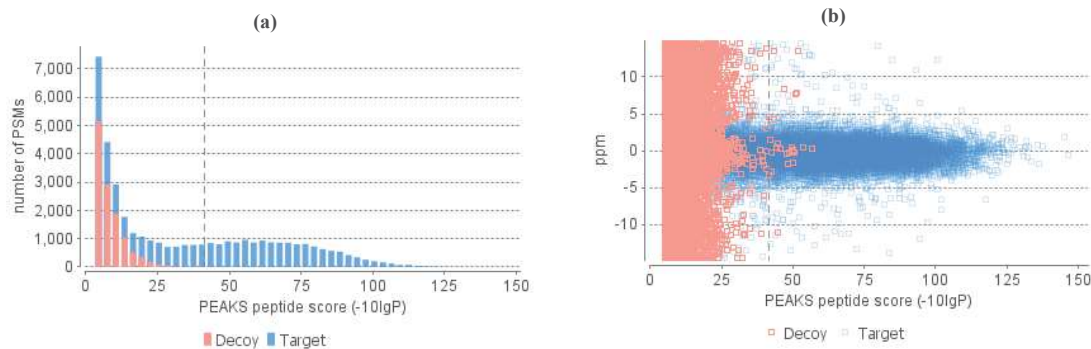**Figure 3.** De novo result validation. Distribution of residue local confidence: (a) Residues in de novo sequences validated by confident database peptide assignment; (b) Residues in "de novo only" sequences.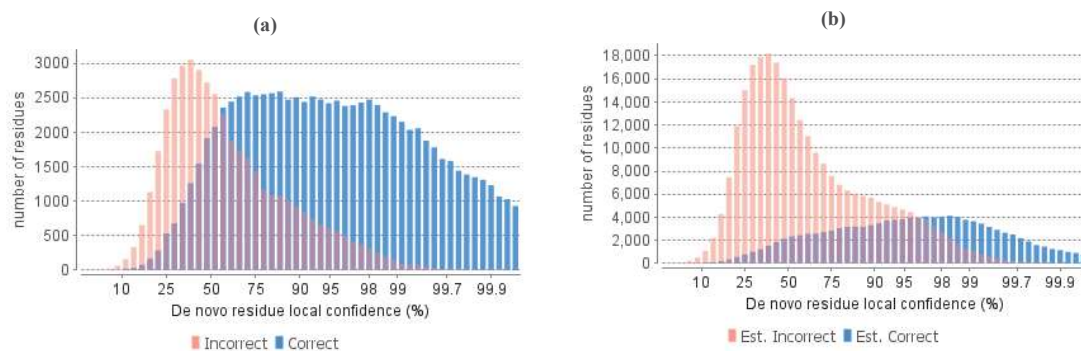**Table 1.** Statistics of data.

|                  |        |
|------------------|--------|
| # of MS scans    | 224271 |
| # of MS/MS scans | 332306 |

**Table 2.** Result filtration parameters.

|                          |             |
|--------------------------|-------------|
| Peptide -10lgP           | $\geq 41.5$ |
| Peptide AScore           | $\geq 0$    |
| Protein -10lgP           | $\geq 89.5$ |
| Proteins unique peptides | $\geq 0$    |
| De novo ALC Score        | $\geq 50\%$ |

**Table 3.** Statistics of filtered result.**Table 4.** PTM profile.

| Name | $\Delta$ Mass | Position | #PSM | -10lgP | Area | AScore |
|------|---------------|----------|------|--------|------|--------|
|------|---------------|----------|------|--------|------|--------|

|                                |                            |
|--------------------------------|----------------------------|
| Peptide-Spectrum Matches       | 15249                      |
| Peptide sequences              | 740                        |
| Protein groups                 | 199                        |
| Proteins                       | 199                        |
| Proteins (#Unique Peptides)    | 151 (>2); 37 (=2); 9 (=1); |
| FDR (Peptide-Spectrum Matches) | 0.2%                       |
| FDR (Peptide Sequences)        | 0.9%                       |
| FDR (Protein)                  | 1.0%                       |
| De Novo Only Spectra           | 27127                      |

### 3. Experiment Control

**Figure 4.** Precursor mass error of peptide-spectrum matches (PSM) in filtered result. **(a)** Distribution of precursor mass error in ppm; **(b)** Scatterplot of precursor m/z versus precursor mass error in ppm.

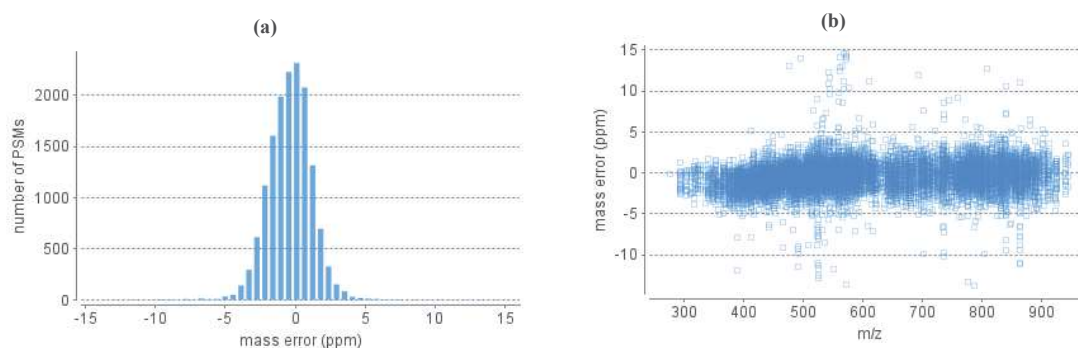

**Table 5.** Number of identified peptides in each sample by the number of missed cleavages

| Missed Cleavages | 0 | 1 | 2 | 3 | 4+ |
|------------------|---|---|---|---|----|
| 46_0000_1        | 0 | 0 | 0 | 0 | 5  |
| 46_0000_2        | 0 | 0 | 0 | 0 | 27 |
| 46_0000_3        | 0 | 0 | 0 | 0 | 34 |
| 46_0000_4        | 0 | 0 | 0 | 0 | 21 |
| 46_0015_1        | 0 | 0 | 0 | 0 | 62 |
| 46_0015_2        | 0 | 0 | 0 | 0 | 49 |
| 46_0015_3        | 0 | 0 | 0 | 0 | 14 |
| 46_0015_4        | 0 | 0 | 0 | 0 | 2  |
| 46_0060_1        | 0 | 0 | 0 | 0 | 5  |
| 46_0060_2        | 0 | 0 | 0 | 0 | 59 |
| ...              |   |   |   |   |    |

### 4. Other Information

**Table 6.** Search parameters.

Search Engine Name: PEAKS  
 Parent Mass Error Tolerance: 15.0 ppm  
 Fragment Mass Error Tolerance: 0.01 Da  
 Precursor Mass Search Type: monoisotopic  
 Enzyme: None  
 Max Missed Cleavages: 100  
 Non-specific Cleavage: both  
 Max Variable PTM Per Peptide: 3  
 Database: TDP\_237library\_07202017  
 Taxon: All  
 Searched Entry: 228  
 FDR Estimation: Enabled  
 Different data refine parameters are used for this search:

**Table 7.** Instrument parameters.

Fractions: MY\_20180116\_46\_0000\_1.raw, MY\_20180116\_46\_0000\_2.raw, MY\_20180116\_46\_0000\_3.raw, MY\_20180116\_46\_0000\_4.raw, MY\_20180116\_46\_0015\_1\_Reinject.raw, MY\_20180116\_46\_0015\_2.raw, MY\_20180116\_46\_0015\_3.raw, MY\_20180116\_46\_0015\_4.raw, MY\_20180116\_46\_0060\_1.raw, MY\_20180116\_46\_0060\_2.raw, MY\_20180116\_46\_0060\_3.raw, MY\_20180116\_46\_0060\_4.raw, MY\_20180116\_72\_0000\_1.raw, MY\_20180116\_72\_0000\_2.raw, MY\_20180116\_72\_0000\_3.raw, MY\_20180116\_72\_0000\_4.raw, MY\_20180116\_72\_0015\_1.raw, MY\_20180116\_72\_0015\_2.raw, MY\_20180116\_72\_0015\_3.raw, MY\_20180116\_72\_0015\_4.raw, MY\_20180116\_72\_0060\_1.raw, MY\_20180116\_72\_0060\_2.raw, MY\_20180116\_72\_0060\_3.raw, MY\_20180116\_72\_0060\_4.raw  
 Ion Source: ESI(nano-spray)  
 Fragmentation Mode: high energy CID (y and b ions)  
 MS Scan Mode: FT-ICR/Orbitrap  
 MS/MS Scan Mode: FT-ICR/Orbitrap

# 1. Notes

## 2. Result Statistics

**Figure 1.** False discovery rate (FDR) curve. X axis is the number of peptide-spectrum matches (PSM) being kept. Y axis is the corresponding FDR.

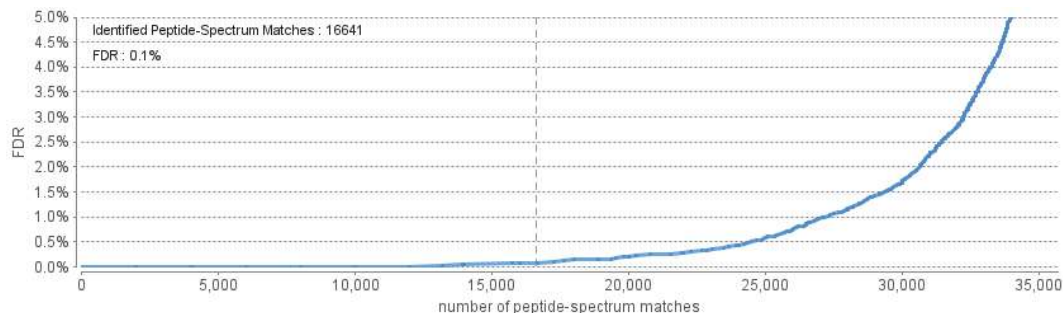

**Figure 2.** PSM score distribution. (a) Distribution of PEAKS peptide score; (b) Scatterplot of PEAKS peptide score versus precursor mass error.

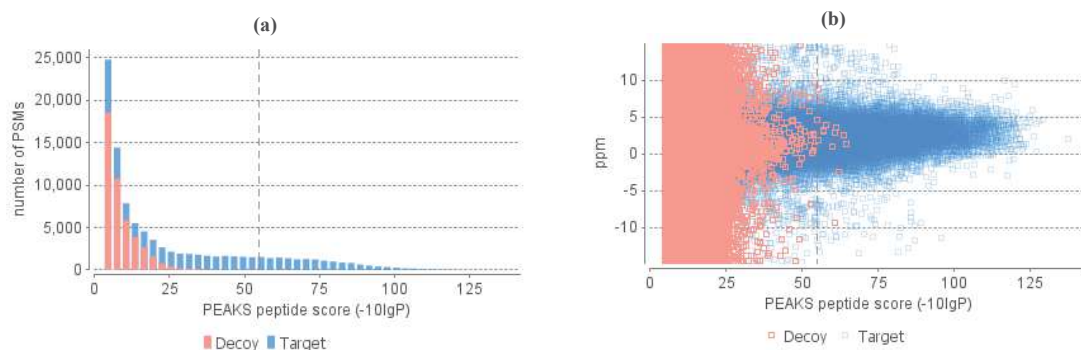

**Figure 3.** De novo result validation. Distribution of residue local confidence: (a) Residues in de novo sequences validated by confident database peptide assignment; (b) Residues in "de novo only" sequences.

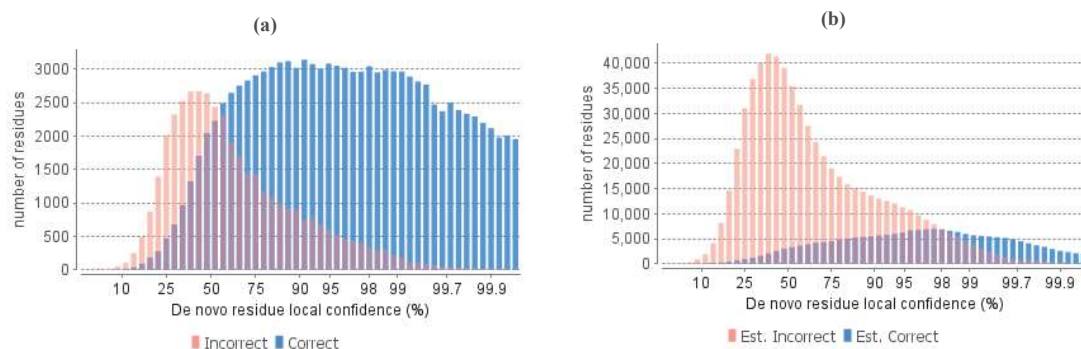

**Table 1.** Statistics of data.  
 # of MS scans 462226  
 # of MS/MS scans 995943

**Table 2.** Result filtration parameters.  
 Peptide -10lgP ≥55  
 Peptide AScore ≥0  
 Protein -10lgP ≥20  
 Proteins unique peptides ≥0  
 De novo ALC Score ≥50%

**Table 3.** Statistics of filtered result.

**Table 4.** PTM profile.

| Name | ΔMass | Position | #PSM | -10lgP | Area | AScore |
|------|-------|----------|------|--------|------|--------|
|------|-------|----------|------|--------|------|--------|

|                                |                             |
|--------------------------------|-----------------------------|
| Peptide-Spectrum Matches       | 16641                       |
| Peptide sequences              | 639                         |
| Protein groups                 | 435                         |
| Proteins                       | 435                         |
| Proteins (#Unique Peptides)    | 109 (>2); 34 (=2); 32 (=1); |
| FDR (Peptide-Spectrum Matches) | 0.1%                        |
| FDR (Peptide Sequences)        | 0.9%                        |
| FDR (Protein)                  | 106.2%                      |
| De Novo Only Spectra           | 69052                       |

### 3. Experiment Control

**Figure 4.** Precursor mass error of peptide-spectrum matches (PSM) in filtered result. **(a)** Distribution of precursor mass error in ppm; **(b)** Scatterplot of precursor m/z versus precursor mass error in ppm.

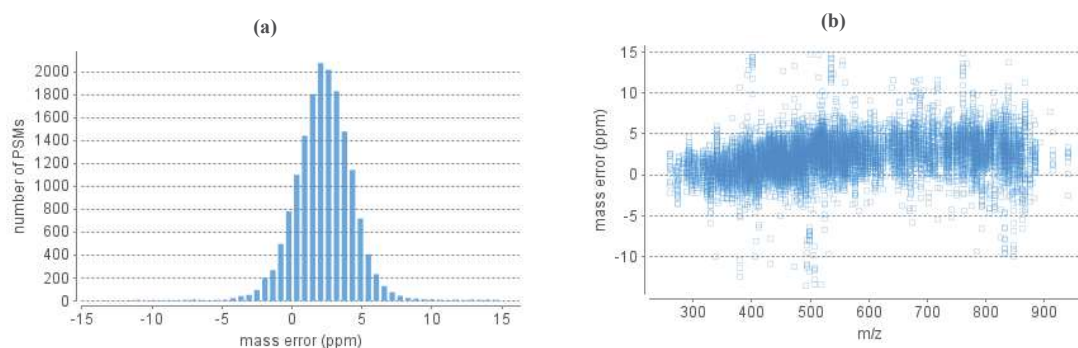

**Table 5.** Number of identified peptides in each sample by the number of missed cleavages

| Missed Cleavages | 0 | 1 | 2 | 3 | 4+ |
|------------------|---|---|---|---|----|
| 4aCA             | 0 | 0 | 0 | 0 | 6  |
| 4aEK             | 0 | 0 | 0 | 0 | 21 |
| 4aQ              | 0 | 0 | 0 | 0 | 8  |
| 4aRK             | 0 | 0 | 0 | 0 | 28 |
| 4a               | 0 | 0 | 0 | 0 | 33 |
| 4bCA             | 0 | 0 | 0 | 0 | 8  |
| 4bEK             | 0 | 0 | 0 | 0 | 15 |
| 4bQ              | 0 | 0 | 0 | 0 | 7  |
| 4bRK             | 0 | 0 | 0 | 0 | 3  |
| 4b               | 0 | 0 | 0 | 0 | 16 |
| ...              |   |   |   |   |    |

### 4. Other Information

**Table 6.** Search parameters.

Search Engine Name: PEAKS  
 Parent Mass Error Tolerance: 15.0 ppm  
 Fragment Mass Error Tolerance: 0.01 Da  
 Precursor Mass Search Type: monoisotopic  
 Enzyme: None  
 Max Missed Cleavages: 100  
 Non-specific Cleavage: both  
 Max Variable PTM Per Peptide: 3  
 Database: TDP\_237library\_07202017  
 Taxon: All  
 Searched Entry: 228  
 FDR Estimation: Enabled  
 Different data refine parameters are used for this search:

**Table 7.** Instrument parameters.

Fractions: 4aCA\_MY\_pH46\_60.raw, 4aEK\_MY\_pH46\_60.raw, 4aQ\_MY\_pH46\_60\_200502050824.raw, 4aRK\_MY\_pH46\_60\_200501191944.raw, 4a\_MY\_pH46\_60.raw, 4bCA\_MY\_pH46\_60\_200501172201.raw, 4bEK\_MY\_pH46\_60\_200501110132.raw, 4bQ\_MY\_pH46\_60\_200502011255.raw, 4bRK\_MY\_pH46\_60\_200501152411.raw, 4b\_MY\_pH46\_60.raw, 4cCA\_MY\_pH46\_60\_0.raw, 4cEK\_MY\_pH46\_60.raw, 4cQ\_MY\_pH46\_60.raw, 4cRK\_MY\_pH46\_60.raw, 4c\_MY\_pH46\_60.raw, 4dCA\_MY\_pH46\_60.raw, 4dEK\_MY\_pH46\_60.raw, 4dQ\_MY\_pH46\_60.raw, 4dRK\_MY\_pH46\_60.raw, 4d\_MY\_pH46\_60\_0.raw, 7aCA\_MY\_pH72\_60\_200501211728.raw, 7aEK\_MY\_pH72\_60.raw, 7aQ\_MY\_pH46\_60\_200502031039.raw, 7aRK\_MY\_pH72\_60.raw, 7a\_MY\_pH72\_60\_200501231512.raw, 7bCA\_MY\_pH72\_60\_200502070608.raw, 7bEK\_MY\_pH72\_60.raw, 7bQ\_MY\_pH46\_60.raw, 7bRK\_MY\_pH72\_60.raw, 7b\_MY\_pH72\_60.raw, 7cCA\_MY\_pH72\_60.raw, 7cEK\_MY\_pH72\_60.raw, 7cQ\_MY\_pH46\_60.raw, 7cRK\_MY\_pH72\_60.raw, 7c\_MY\_pH72\_60.raw, 7dCA\_MY\_pH72\_60.raw, 7dEK\_MY\_pH72\_60.raw, 7dQ\_MY\_pH46\_60.raw, 7dRK\_MY\_pH72\_60.raw, 7d\_MY\_pH72\_60.raw, CAOnly.raw, EKOnly.raw, RKOnly.raw  
 Ion Source: ESI(nano-spray)  
 Fragmentation Mode: high energy CID (y and b ions)  
 MS Scan Mode: FT-ICR/Orbitrap  
 MS/MS Scan Mode: FT-ICR/Orbitrap
